# Supplementary material for: Y-chromosome and Surname Analyses for Reconstructing Past Population Structures: The Sardinian Population as a Test Case
Source: MDPI journal article supplement (doi:10.3390/ijms20225763), 2019-11-16
Supplement: s1 [file s1]

**Figure S5.** Network of Y-STR haplotypes belonging to I2-M26(xL160) Y chromosomes.

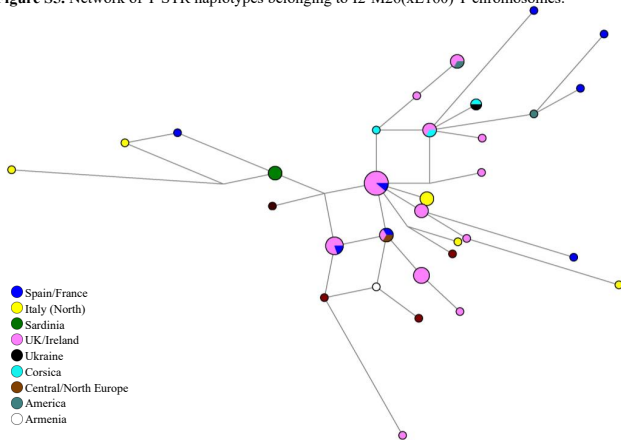

Network analysis was performed on Sardinian samples in comparison with all the I2-M26(xL160) samples available in the literature (Table S8). Circles and colored sectors are proportional to the number of subjects, with the smallest circle equal to one Y chromosome; connecting lines are proportional to the number of mutations.
