# Supplementary material for: Y-chromosome and Surname Analyses for Reconstructing Past Population Structures: The Sardinian Population as a Test Case
Source: MDPI journal article supplement (doi:10.3390/ijms20225763), 2019-11-16
Supplement: s1 [file s1]

**Figure S1. Linguistic areas of Sardinia.**

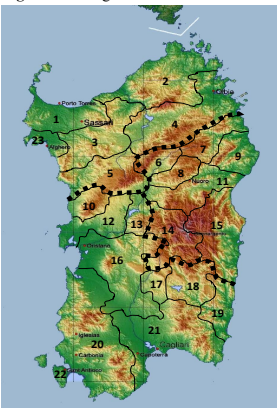

**NORTHER AREA:**

- 1 Sassarese
- 2 Gallurese
- 3 North-West Logudoro
- 4 East Logudoro
- 5 South Logudoro – Planargia
- 23 Alghero

**CENTRAL-EASTERN AREA:**

- 6 Goceano
- 7 Circondario di Bitti
- 8 Nuorese
- 9 Baronia di Orosei Siniscola
- 11 Fonni - Barbagia di Ollolai
- 14 Barbagia di Belvi
- 15 Ogliastra

**SOUTH-WESTERN AREA:**

- 10 Montiferru
- 12 North Campidano of Oristano
- 13 Media valle del Tirso
- 16 South Campidano of Oristano Arborea – Trexenta
- 17 Trexenta – Parteolla
- 18 Transition between Gerrei and Trexenta
- 19 Sarrabus
- 20 Sulcis-Iglesiente
- 21 Campidano di Cagliari
- 22 Carloforte

Dashed lines indicate the three main linguistic areas of Sardinia.
