# Supplementary material for: Y-chromosome and Surname Analyses for Reconstructing Past Population Structures: The Sardinian Population as a Test Case
Source: MDPI journal article supplement (doi:10.3390/ijms20225763), 2019-11-16

**Figure S6.** Two-dimensional plot obtained from MDS analysis based on pairwise RST values for seven-loci Y-STR haplotypes associated to haplogroup I2-M26 observed in Sardinians and other populations of the Mediterranean Basin.

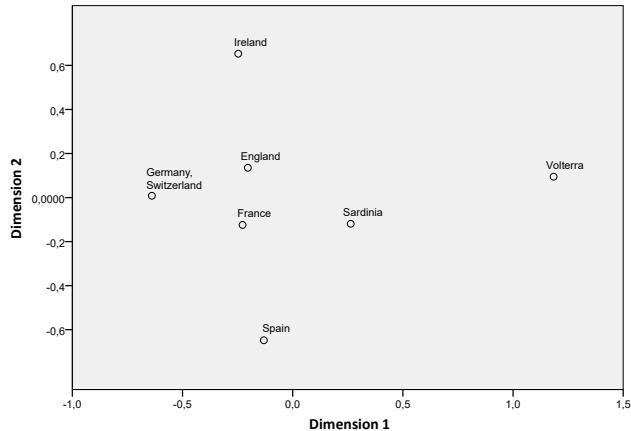

Supplement: s1 [file s1]
