# Supplementary material for: Y-chromosome and Surname Analyses for Reconstructing Past Population Structures: The Sardinian Population as a Test Case
Source: MDPI journal article supplement (doi:10.3390/ijms20225763), 2019-11-16

**Figure S7.** Y-chromosome haplogroup distribution per macro-area of ancient Sardinian samples. For each bar plot: the name of haplogroups on the left side, the temporal range of the ancient samples, on the right side.

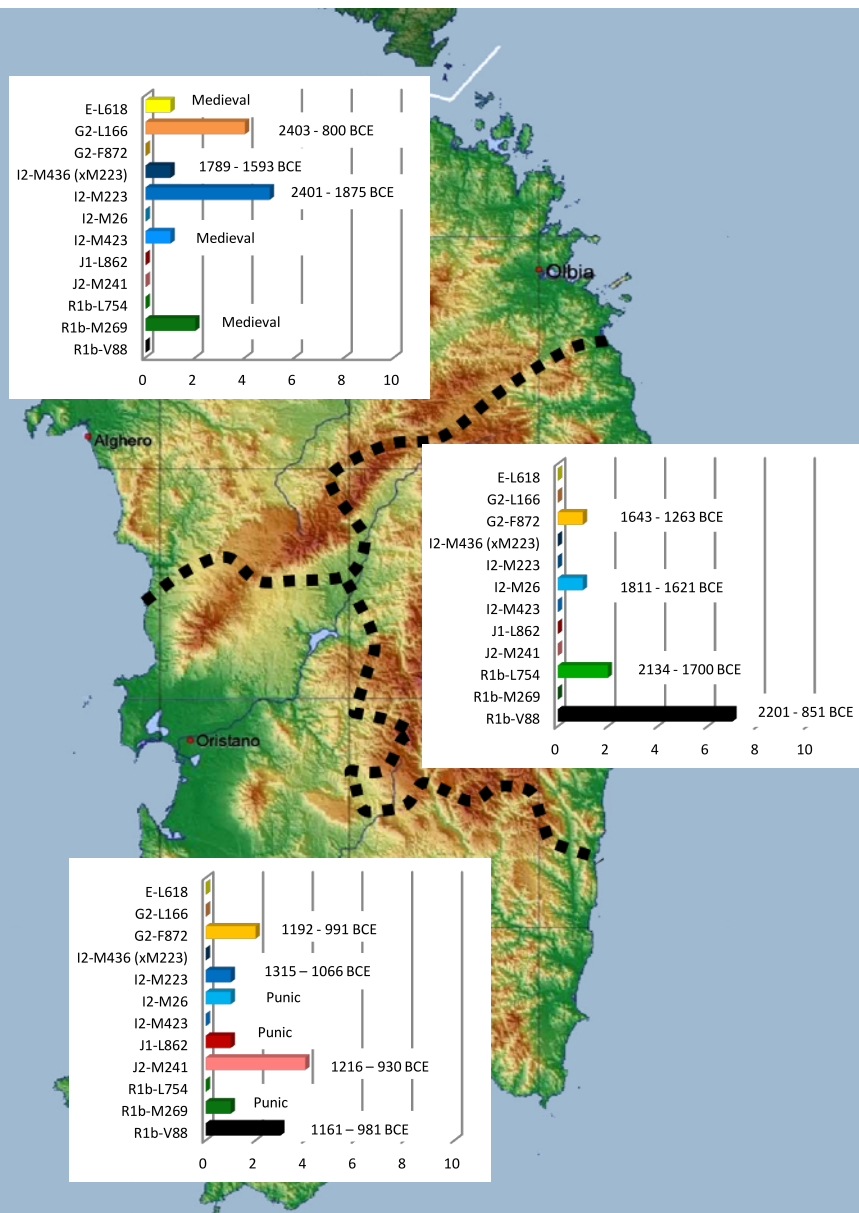

Supplement: s1 [file s1]
